# Supplementary material for: Influence of chain topology on polymer crystallization: poly(ethylene oxide) (PEO) rings vs. linear chains
Source: Royal Society of Chemistry journal article supplement (doi:10.1039/c6sm01622g), 2016-01-01
Supplement: c6sm01622g1.pdf [file c6sm01622g1.pdf]

## Supporting Information

### Influence of Chain Topology on Polymer Crystallization: Poly(ethylene oxide) (PEO) Rings vs. Linear chains.

George Zardalidis, Julian Mars, Allgaier Jürgen, Markus Mezger,  
Dieter Richter and George Floudas

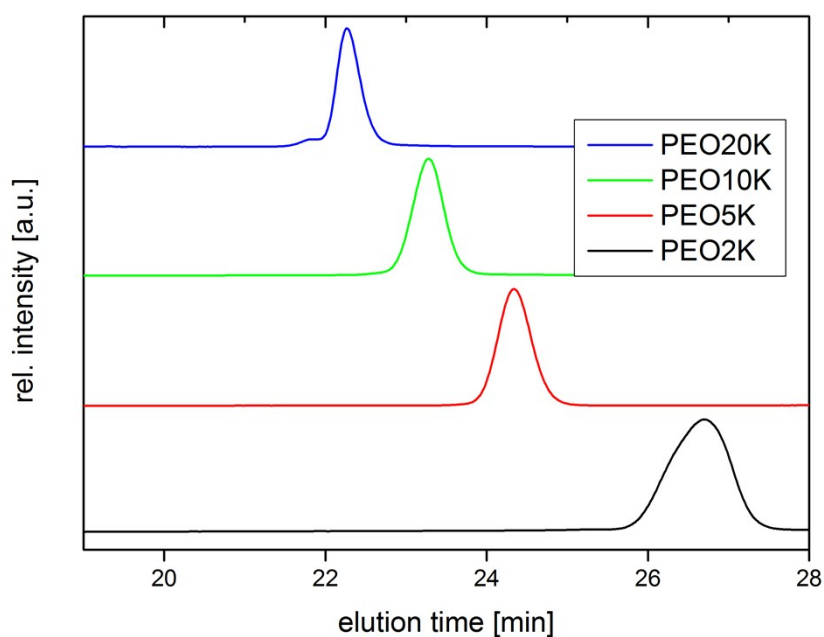

**Figure S1.** SEC traces of the purified ring polymers. In the elugram of sample PEO20K the small shoulder to the left of the main signal shows the presence of a smaller quantity of linear polymer.

(a) Thermodynamics- DSC

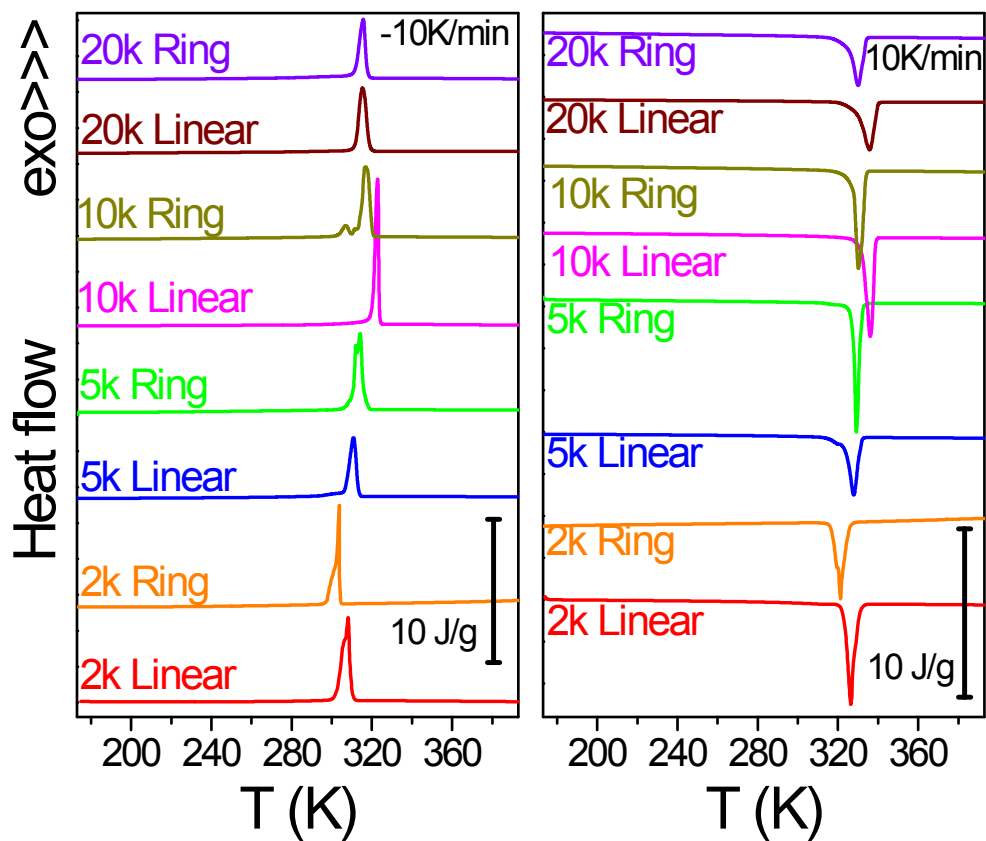

**Fig. S2.** DSC traces of linear and ring PEO samples obtained on cooling (left) and subsequent heating (right) with 10 K/min. In general, rings melt at a lower temperature.

(b) Structure SAXS

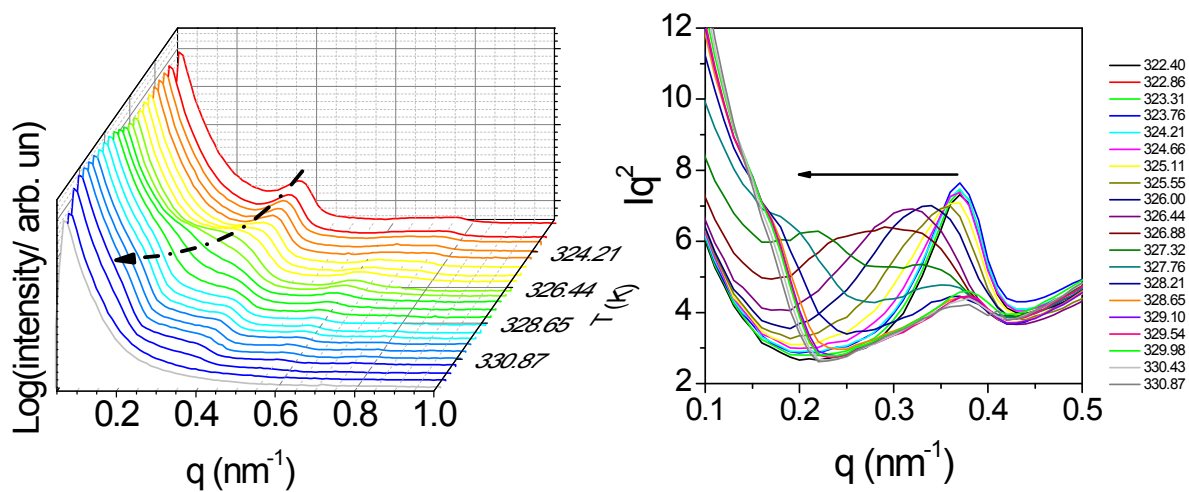

**Fig. S3.** SAXS patterns of L5k PEO obtained on heating following isothermal crystallization at 322 K. The corresponding Lorentz-corrected patterns are also shown (the corresponding temperatures are indicated in the inset).

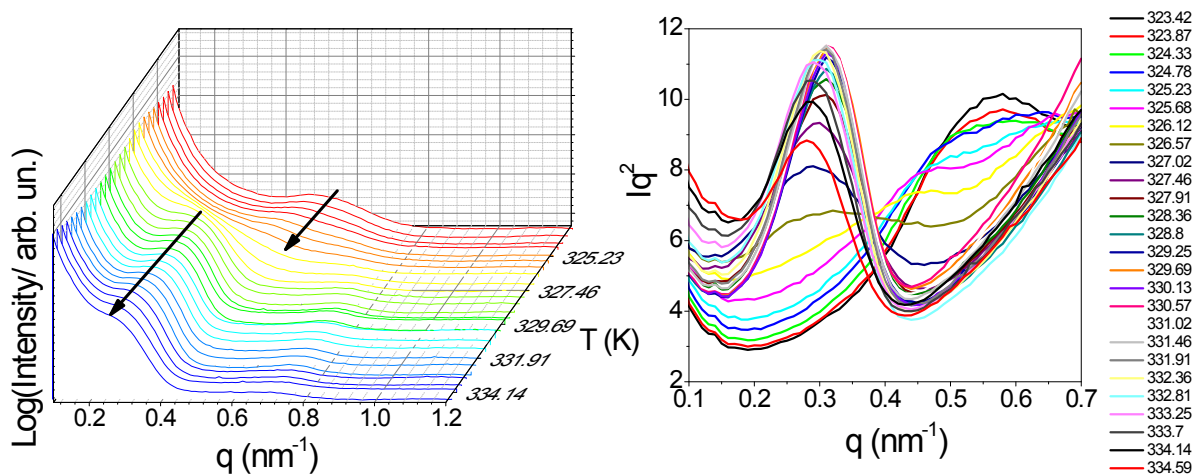

**Fig. S4.** SAXS patterns of R5k PEO obtained on heating following isothermal crystallization at 323 K. The corresponding Lorentz-corrected patterns are also shown (the corresponding temperatures are indicated in the inset).

In order to obtain detailed structural information, the background- and Lorentz corrected scattering curves were further analyzed with respect to the correlation function analysis. The electron density correlation function,  $K(z)$ , was obtained from the inverse Fourier transformation of the intensity distribution,  $I(q)$ , as follows:

$$K(z) = \frac{\int_0^{\infty} I(q)q^2 \cos(qz) dq}{\int_0^{\infty} I(q)q^2 dq}$$

Here  $z$  denotes the location measured along a trajectory normal to the lamellar surfaces. This analysis allows obtaining directly the long spacing,  $d$ , and interlamellar amorphous layer measured along the lamellar normal ( $d_a$ ). The crystalline lamellar thickness is then obtained as  $d_c = d - d_a$ . This type of analysis was made for R5k crystallized at the higher temperature (*i.e.* at 325 K) and heated to 333 K and the result is shown in Fig. S5. The interplay between the peaks at lower and higher  $q$ 's at temperatures precludes a similar analysis at the lower temperatures (321 K and 323 K).

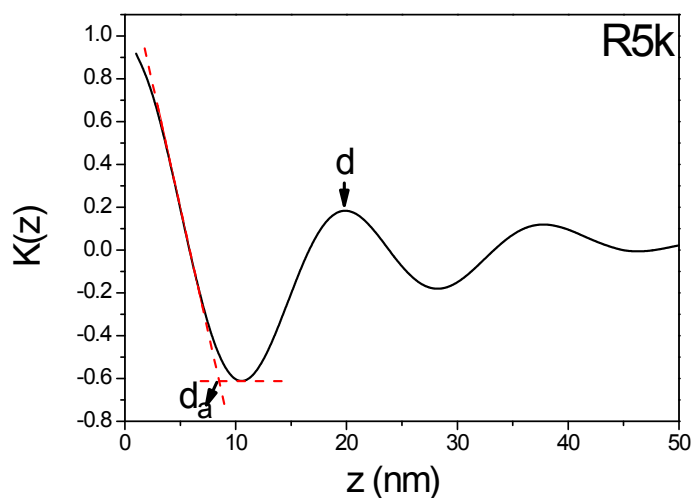

**Fig. S5.** Correlation function curve for R5k crystallized at 325 K and heated with 0.15 K/min to 333 K. The long spacing,  $d$  ( $\sim 20$  nm), and interlamellar amorphous layer thickness,  $d_a$  ( $\sim 8$  nm) are shown.

(c) Segmental dynamics - DS

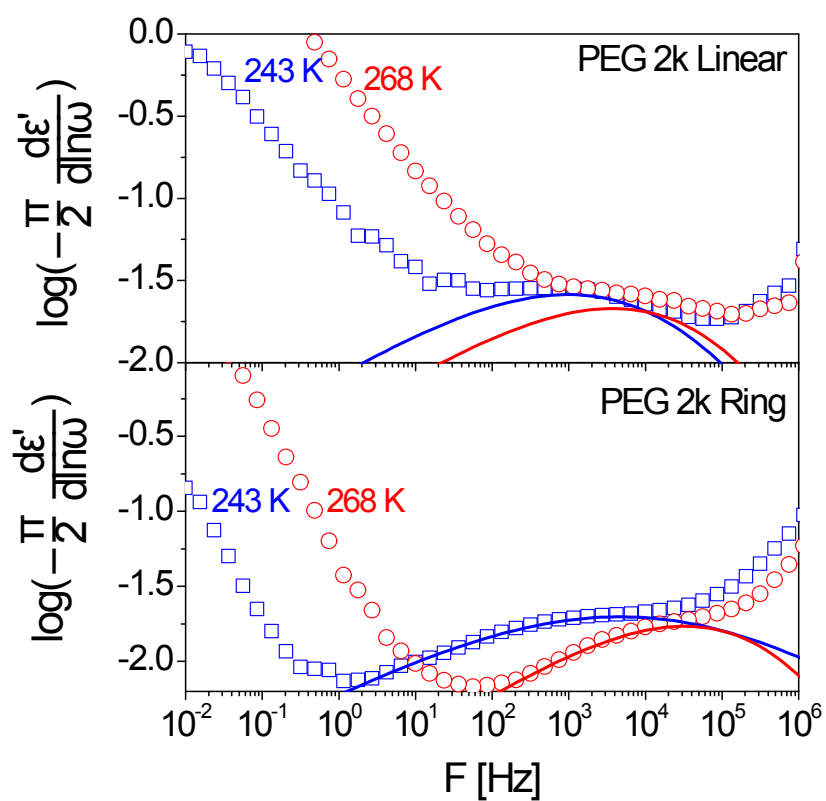

**Fig. S6.** Representative fits of the segmental relaxation times of L2k and R2k at 243 K and 268 K (lines) using the derivative approach. The low-frequency HN slope,  $m$  is 0.34 and 0.23 for L2k and R2k, respectively.

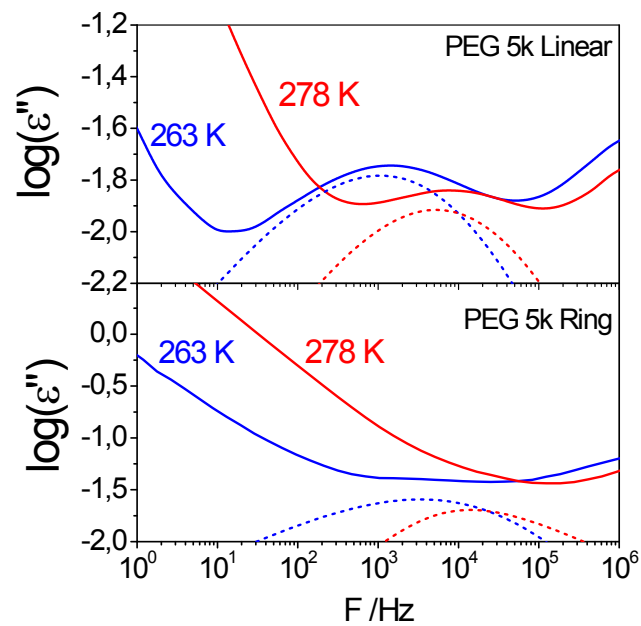

**Fig. S7.** Representative fits of the segmental relaxation times of L5k and R5k at 263 K and 278 K (lines) using dielectric loss data. The low-frequency HN slope,  $m$  is 0.46 and 0.13 for L5k and R5k, respectively.
